# Supplementary material for: Porous carbon with large surface area derived from a metal–organic framework as a lithium-ion battery anode material
Source: Royal Society of Chemistry journal article supplement (doi:10.1039/c7ra05090a), 2017-01-01
Supplement: c7ra05090a1.pdf [file c7ra05090a1.pdf]

## ***Supporting Information***

### **Porous carbon with large surface area derived from metal-organic framework as a lithium-ion battery anode material**

Hai-Jun Peng,<sup>a</sup> Gui-Xia Hao,<sup>b</sup> Zhao-Hua Chu,<sup>b</sup> Yin-Wan Lin,<sup>a</sup> Xiao-Ming Lin,<sup>\*a,c</sup> and Yue-Peng Cai<sup>\*a</sup>

<sup>a</sup> *School of Chemistry and Environment, South China Normal University, Guangzhou Key Laboratory of Materials for Energy Conversion and Storage, 510006, P.R. China*

<sup>b</sup> *College of chemistry and environmental engineering, Hanshan Normal University, Chaozhou, Guangdong 521041, P. R. China*

<sup>c</sup> *Key Laboratory of Theoretical Chemistry of Environment, Ministry of Education, School of Chemistry and Environment, South China Normal University, Guangzhou 510006, P.R. China.*

*E-mail: [linxm@scnu.edu.cn](mailto:linxm@scnu.edu.cn); [caiyp@scnu.edu.cn](mailto:caiyp@scnu.edu.cn)*

**Table S1** Crystal data and structure refinement for Cd-MOF.

|                                                                                              |                                                                                  |
|----------------------------------------------------------------------------------------------|----------------------------------------------------------------------------------|
| Empirical formula                                                                            | C <sub>60</sub> H <sub>48</sub> Cd <sub>3</sub> N <sub>2</sub> O <sub>22</sub> * |
| Formula weight                                                                               | 1486.23                                                                          |
| Crystal system                                                                               | Orthorhombic                                                                     |
| Space group                                                                                  | F d d d                                                                          |
| <i>a</i> (Å)                                                                                 | 16.8213(16)                                                                      |
| <i>b</i> (Å)                                                                                 | 41.992(4)                                                                        |
| <i>c</i> (Å)                                                                                 | 49.548(4)                                                                        |
| $\alpha$ (°)                                                                                 | 90                                                                               |
| $\beta$ (°)                                                                                  | 90                                                                               |
| $\gamma$ (°)                                                                                 | 90                                                                               |
| <i>V</i> (Å <sup>3</sup> )                                                                   | 34999(5)                                                                         |
| <i>Z</i>                                                                                     | 16                                                                               |
| $\rho_{\text{calc}}$ (g/cm <sup>3</sup> )                                                    | 1.221                                                                            |
| <i>F</i> (000)                                                                               | 12928                                                                            |
| $\mu$ (mm <sup>-1</sup> )                                                                    | 6.359                                                                            |
| Reflections collected                                                                        | 6218                                                                             |
| GOF                                                                                          | 1.095                                                                            |
| <i>R</i> <sub>1</sub> , <i>wR</i> <sub>2</sub> indices [ <i>I</i> > 2 $\sigma$ ( <i>I</i> )] | 0.0651, 0.1895                                                                   |
| <i>R</i> <sub>1</sub> , <i>wR</i> <sub>2</sub> indices (all data)                            | 0.0764, 0.2029                                                                   |

\*Distorted water molecules were calculated by PLATON/SQUEEZE program and confirmed by EA and TGA, which is not shown in final formula in CIF files.

**Table S2** Selected bond lengths (Å) and bond angles (°) for Cd-MOF.

| Cd-MOF             |           |                     |          |
|--------------------|-----------|---------------------|----------|
| Cd(2)-O(6)#1       | 2.202(10) | O(6)#1-Cd(2)-O(6)#2 | 180.0    |
| Cd(2)-O(6)#2       | 2.202(10) | O(6)#1-Cd(2)-O(9)#3 | 90.7(4)  |
| Cd(2)-O(9)#3       | 2.264(12) | O(6)#2-Cd(2)-O(9)#3 | 89.3(4)  |
| Cd(2)-O(9)#4       | 2.264(12) | O(6)#1-Cd(2)-O(9)#4 | 89.3(4)  |
| Cd(2)-O(5)         | 2.319(8)  | O(6)#2-Cd(2)-O(9)#4 | 90.7(4)  |
| Cd(2)-O(5)#5       | 2.381(16) | O(9)#3-Cd(2)-O(9)#4 | 180.0    |
| Cd(1)-O(8)#3       | 2.225(10) | O(6)#1-Cd(2)-O(5)   | 90.5(4)  |
| Cd(1)-O(11)        | 2.238(12) | O(6)#2-Cd(2)-O(5)   | 89.5(4)  |
| Cd(1)-O(7)#1       | 2.290(9)  | O(9)#3-Cd(2)-O(5)   | 82.2(4)  |
| Cd(1)-O(5)         | 2.330(10) | O(9)#4-Cd(2)-O(5)   | 97.8(4)  |
| Cd(1)-O(1W)        | 2.323(11) | O(6)#1-Cd(2)-O(5)#5 | 89.5(3)  |
| Cd(1)-O(4)         | 2.346(8)  | O(6)#2-Cd(2)-O(5)#5 | 90.5(3)  |
| O(11)-Cd(1)-O(7)#1 | 89.9(5)   | O(5)-Cd(2)-O(5)#5   | 180.0    |
| O(8)#3-Cd(1)-O(5)  | 109.6(4)  | O(8)#3-Cd(1)-O(11)  | 97.7(5)  |
| O(8)#3-Cd(1)-O(1W) | 86.1(4)   | O(8)#3-Cd(1)-O(7)#1 | 101.7(3) |

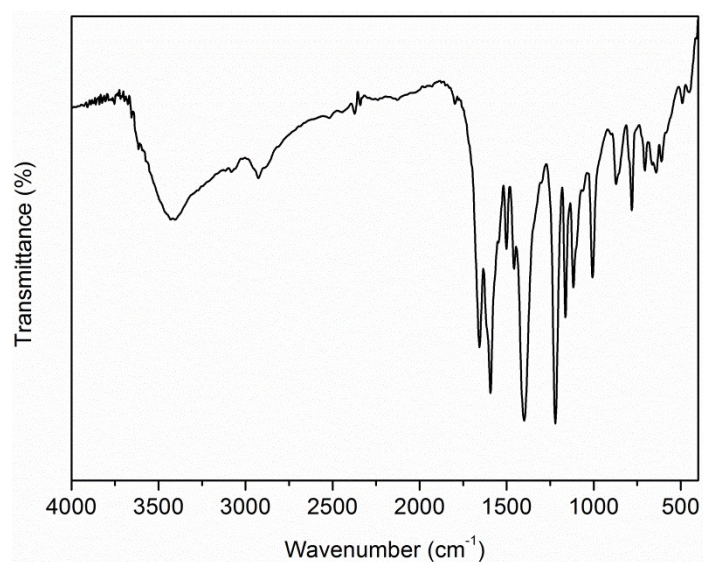

**Fig. S1** IR spectra of as-synthesized Cd-MOF.

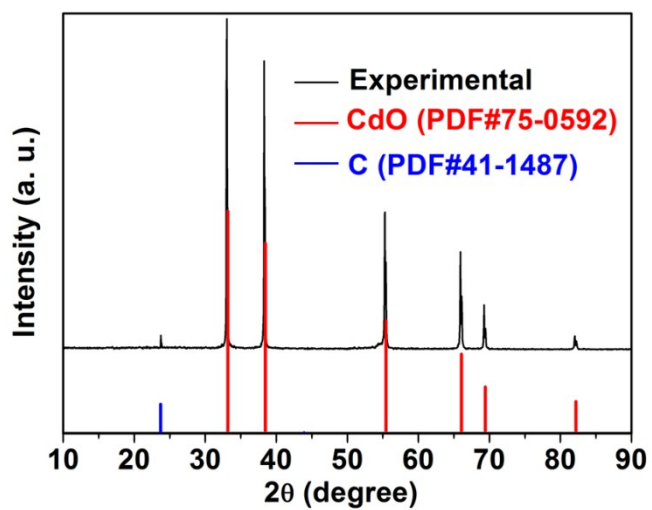

**Fig. S2** PXRD pattern of the obtained product calcined under N<sub>2</sub> atmosphere at 800°C for 2h.

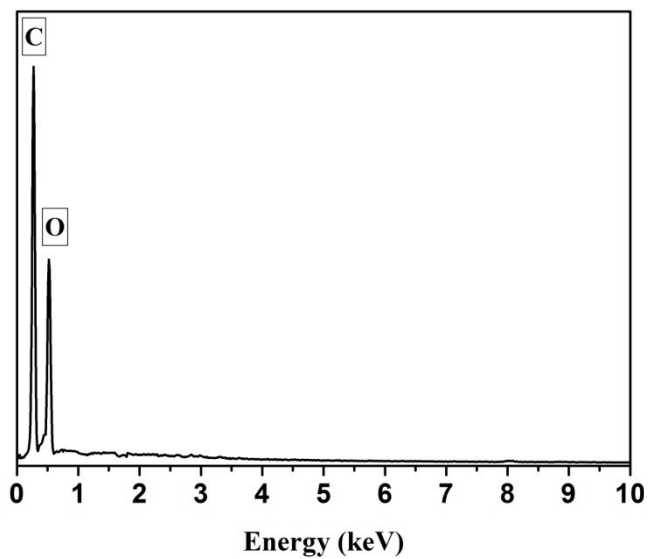

Fig. S3 EDS of the obtained carbon material.

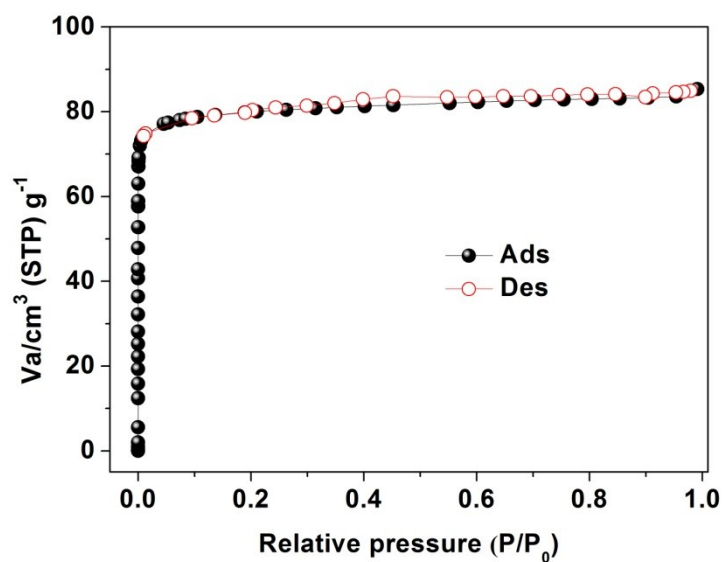

Fig. S4 Nitrogen adsorption-desorption isotherms of Cd-MOF.
